# Supplementary material for: Formation of CC-type palladacycles with assistance from an apparently innocent NH(CO) functional group
Source: Royal Society of Chemistry journal article supplement (doi:10.1039/c2cc31299a), 2012-01-01
Supplement: c2cc31299a.pdf [file c2cc31299a.pdf]

## Electronic supplementary information

### Formation of CC-type palladacycles with assistance from an apparently innocent NH(CO) functional group

*Jhen-Yi Lee, Yao-Huei Huang, Shu-Ya Liu, Shun-Chu Cheng, Yan-Min Zhou, Jenn-Huei Lii  
and Hon Man Lee\**

**General consideration.** All manipulations were performed under a dry nitrogen atmosphere using standard Schlenk techniques. Solvents were dried with standard procedures. Starting chemicals were purchased from commercial source and used as received.  $^1\text{H}$ ,  $^{13}\text{C}\{^1\text{H}\}$  and  $^{31}\text{P}\{^1\text{H}\}$  NMR spectra were recorded at 300.13, 75.48, and 121.49 MHz, respectively, on a Bruker AV-300 spectrometer. Infra-red spectra were acquired from a Varian Cary 640 infra-red spectrophotometer. Elemental analyses were performed on a Thermo Flash 2000 CHN-O elemental analyzer. Electrospray ionization (ESI) and atmospheric-pressure chemical ionization (APCI) mass spectrometry were performed on a Finnigan/Thermo TSQ Quantum triple quadrupole mass spectrometer.

**Synthesis of L<sup>1</sup>.** A mixture of 1-(4-fluorobenzyl)-2-methyl-1*H*-imidazole (10.9 g, 0.0570 mol) and 2-chloro-*N*-phenylacetamide<sup>1</sup> (9.70 g, 0.0570 mol) in THF (30 mL) was placed in a Schlenk flask. The mixture was heated under reflux for 2 d. After cooling, the white solid was collected on a frit, washed with THF, and dried under vacuum. Yield: 15.4 g (75%). Anal. Calc. for C<sub>19</sub>H<sub>19</sub>ClFN<sub>3</sub>O: C, 63.42; H, 5.32; N, 11.67%. Found: C, 63.42; H, 5.37; N, 11.70 %.  $^1\text{H}$  NMR (DMSO-*d*<sub>6</sub>):  $\delta$  2.26 (s, 3H, CH<sub>3</sub>), 5.29 (s, 2H, CH<sub>2</sub>), 5.50 (s, 2H, CH<sub>2</sub>), 7.10 (t,  $^3J_{\text{HH}} = 7.2$  Hz, 1H, *p*-Ph-*H*), 7.25–7.46 (m, 6H, Ar-*H*, imi-*H*), 7.65 (d,  $^3J_{\text{HH}} = 7.5$  Hz, 2H, *o*-Ph-*H*), 7.81–7.83 (m, 2H, Ar-*H*, imi-*H*), 11.22 (s,

1H, NH).  $^{13}\text{C}\{^1\text{H}\}$  NMR (DMSO- $d_6$ ):  $\delta$  10.3 (CH<sub>3</sub>), 50.3 (NCH<sub>2</sub>), 51.0 (CH<sub>2</sub>CO), 116.3 (d,  $J_{\text{CF}}$  = 21.66 Hz, CH), 119.6, 121.7, 123.4, 124.1, 129.2, 130.6(d,  $J_{\text{CF}}$  = 8.38 Hz, CH), 131.2(d,  $J_{\text{CF}}$  = 3.02 Hz, CH), 138.9 (Ar-C, imi-C), 146.1 (NCN), 162.4 (d,  $J_{\text{CF}}$  = 301.6 Hz, CF), 163.9 (CO).

**Synthesis of L<sup>2</sup>.** A mixture of 1-(naphthalen-1-ylmethyl)-2-phenyl-1H-imidazole (6.45 g, 0.0230 mol) and 2-chloro-N-phenylacetamide (3.46 g, 0.0230 mol) in dry THF (50 mL) was heated at 80°C for 2 d. The workup procedure is similar to that of L<sup>1</sup>. Yield: 5.11 g (49 %). M.p.: 218.9–219.4°C. Anal. Calc. for C<sub>28</sub>H<sub>24</sub>ClN<sub>3</sub>O: C, 74.08; H, 5.32; N, 9.25 %. Found: C, 73.82; H, 5.36; N, 9.28 %.  $^1\text{H}$  NMR (DMSO- $d_6$ ):  $\delta$  5.17 (s, 2H, NpCH<sub>2</sub>), 5.87 (s, 2H, CH<sub>2</sub>C=O), 7.03–7.08 (m, 2H, Ar-H), 7.29 (t,  $^3J_{\text{HH}}$  = 8.1 Hz, 2H, Ar-H), 7.46 (t,  $^3J_{\text{HH}}$  = 7.8 Hz, 1H, *p*-Ar-H), 7.54–7.67 (m, 9H, Ar-H), 7.82–7.99 (m, 3H, Ar-H), 8.05 (d,  $^3J_{\text{HH}}$  = 1.5 Hz, 1H, imi-H), 8.20 (d,  $^3J_{\text{HH}}$  = 1.8 Hz, 1H, imi-H), 11.31 (s, 1H, NH).  $^{13}\text{C}\{^1\text{H}\}$  NMR (DMSO- $d_6$ ):  $\delta$  50.1 (CH<sub>2</sub>), 51.6 (CH<sub>2</sub>), 119.1, 121.2, 123.0, 124.2, 124.7, 125.5, 125.8, 126.8, 127.3, 129.1, 129.4, 129.8, 130.1, 130.5, 130.6, 132.9, 133.5, 138.7 (NC), 146.0 (NCN), 163.8 (CO).

**Synthesis of L<sup>3</sup>.** The compound was prepared with a similar procedure to that of L<sup>1</sup>. A mixture of 1-(4-fluorobenzyl)-2-methyl-1H-imidazole (3.16 g, 0.0170 mol) and 2-chloro-N-methyl-N-phenylacetamide (3.04 g, 0.0170 mol) was used. A white solid was obtained. Yield: 2.73 g (77 %). M.p.: 235.8–236.2°C. Anal. Calc. for C<sub>20</sub>H<sub>21</sub>ClFN<sub>3</sub>O: C, 64.25; H, 5.66; N, 11.23 %. Found: C, 64.51; H, 5.62; N, 11.24 %.  $^1\text{H}$  NMR (DMSO- $d_6$ ):  $\delta$  2.56 (s, 3H, CCH<sub>3</sub>), 3.21 (s, 3H, NCH<sub>3</sub>), 7.26 (t, 2H,  $^3J_{\text{HH}}$  = 8.7 Hz, Ar-H), 7.32–7.86 (m, 9H, Ar-H, imi-H).  $^{13}\text{C}\{^1\text{H}\}$  NMR (DMSO- $d_6$ ):  $\delta$  10.2 (CCH<sub>3</sub>), 37.8 (NCH<sub>3</sub>), 50.2 (NCH<sub>2</sub>, CH<sub>2</sub>CO), 116.3 (d,  $J_{\text{CF}}$  = 21.66 Hz, CH),

121.5, 123.5, 128.0, 128.9, 130.4 (d,  $J_{CF} = 8.68$  Hz, CH), 131.3(d,  $J_{CF} = 3.02$  Hz, CH), 141.8 (Ar-C, imi-C), 146.2 (NCN), 162.4 (d,  $J_{CF} = 245$  Hz, CF), 164.4 (CO).

**Synthesis of 1.** Method A: To a 50 mL Schlenk flask, PdCl<sub>2</sub> (0.0940 g, 0.530 mmol), L<sup>1</sup> (0.190 g, 0.530 mmol), and K<sub>2</sub>CO<sub>3</sub> (0.290 g, 2.12 mmol) were added and dissolved in dry pyridine (10 mL) under nitrogen atmosphere. The solution was allowed to stir at 80°C overnight. The solvent was then completely removed under vacuum. The residue was re-dissolved in dichloromethane and washed with water. The extract was dried over anhydrous MgSO<sub>4</sub> and evaporated to dryness under vacuum to give a light orange solid. Yield: 0.190 g (66%). Method B: To a 20 mL Schlenk flask, **3** (0.0500 g, 0.092 mmol) and dry pyridine (5 mL) were added. The solution was then stirred at 80°C overnight. The solvent was removed completely under vacuum. The residue was washed with diethyl ether. The light orange solid was then filtered on a frit and dried under vacuum. Yield: 0.0490 g (97%). Mp: 142.3-144.8°C. Anal. Calc. for C<sub>24</sub>H<sub>22</sub>ClFN<sub>4</sub>OPd: C, 53.05; H, 4.08; N, 10.31. Found: C, 52.76; H, 4.15; N, 10.05 %. <sup>1</sup>H NMR (CDCl<sub>3</sub>): δ 1.97 (d, <sup>2</sup>J<sub>HH</sub> = 15.3 Hz, 1H, PdCH<sub>a</sub>H<sub>b</sub>), 2.44 (d, <sup>2</sup>J<sub>HH</sub> = 15.3 Hz, 1H, PdCH<sub>a</sub>H<sub>b</sub>), 4.89, 4.97 (ABq, <sup>2</sup>J<sub>AB</sub> = 15.3 Hz, Δ<sub>v</sub><sub>AB</sub> = 12.3 Hz, 2H, NCH<sub>2</sub>), 5.32 (s, 1H, CHC=O), 6.68–7.31 (m, 11H, Ar-H, imi-H, py-H), 7.62–7.72 (m, 3H, py-H, Ar-H), 8.70 (d, <sup>3</sup>J<sub>HH</sub> = 5.1 Hz, 2H, *o*-py-H), 9.89 (s, 1H, NH). <sup>13</sup>C{<sup>1</sup>H} NMR (CDCl<sub>3</sub>): δ 4.1 (PdCH<sub>2</sub>), 49.2 (ArCH<sub>2</sub>), 49.5 (CHC=O), 116.3 (d,  $J_{CF} = 21.8$  Hz, CH), 119.1, 120.8, 122.5, 124.2, 124.7 (py-C), 124.9, 128.8, 129.3 (d,  $J_{CF} = 8.3$  Hz, CH), 137.2 (py-C), 138.5, 150.3 (py-C), 152.4 ( $J_{CF} = 127.2$  Hz, CF), 161.2 (NCN), 174.1 (C=O). IR (KBr/pellet, cm<sup>-1</sup>): 3359 (br, w), 3160 (br, w), 2998 (br, w), 1675 (w), 1625 (s), 1521 (m), 1502 (w), 1457 (s), 1423 (s), 1319 (w), 1272 (m), 1238 (m), 1205 (m), 1166 (br, m),

1054 (m), 989 (w), 927 (w), 875 (w), 808 (m), 775 (w), 711 (s), 680 (s), 582 (w), 539 (w), 476 (w), 420 (w). ESI-MS:  $m/z$  585.9  $[M - Cl + py]^+$ , 548.1  $[M - Cl + CH_3CN]^+$ , 507.1  $[M - Cl]^+$ , 501.0  $[M - Cl - py + DMF]^+$ , 469.0  $[M - Cl - py + CH_3CN]^+$ .

**Synthesis of 2.** Method A: A mixture of **1** (0.0340 g, 0.0625 mmol) and  $PPh_3$  (0.0164 g, 0.0625 mmol) in dichloromethane (10 mL) was stirred at ambient temperature overnight. The solvent was removed completely under vacuum. The residue was washed thoroughly with diethyl ether to afford a yellowish solid. Yield: 0.0382 g (84 %). Method B: A mixture of **4** (0.0810 g, 0.111 mmol) in dry pyridine (5 mL) was stirred at 80°C overnight. The solvent was removed completely under vacuum. The residue was washed with diethyl ether. The solid was then filtered on a frit and dried under vacuum. Yield: 0.0702 g (87%). M.p.: 183.5–184.7°C. Anal. Calc. for  $C_{37}H_{32}ClFN_3OPPd$ : C, 61.16; H, 4.43; N, 5.78 %. Found: C, 61.34; H, 4.53; N, 5.36 %.  $^1H$  NMR ( $CDCl_3$ ):  $\delta$  1.32 (dd,  $^2J_{HH} = 16.2$  Hz,  $^3J_{HP} = 7.5$  Hz, 1H,  $PdCH_aH_b$ ), 1.77 (dd,  $^2J_{HH} = 16.8$  Hz,  $^3J_{HP} = 7.5$  Hz, 1H,  $PdCH_aH_b$ ), 4.59 (s, 2H,  $NCH_2$ ), 5.30 (d, 1H,  $^3J_{PH} = 11.1$  Hz,  $CHCO$ ), 6.82–7.69 (m, 26H, Ar-*H*, imi-*H*), 9.99 (s, 1H, *NH*).  $^{13}C\{^1H\}$  NMR ( $CDCl_3$ ):  $\delta$  7.6 (d,  $J_{PC} = 7.4$  Hz,  $PdCH_2$ ), 49.5 ( $ArCH_2$ ), 60.2 (d,  $J_{PC} = 97.6$  Hz,  $CHCO$ ), 116.2 (d,  $J_{CF} = 21.8$  Hz,  $CH$ ), 119.3, 121.2. (d,  $J_{PC} = 3.7$  Hz, Ph-*C*), 122.2, 122.5, 128.1 (d,  $J_{PC} = 9.5$  Hz,  $CH$ ), 128.5, 129.2, 129.6 (d,  $J_{CF} = 8.5$  Hz,  $CH$ ), 130.0 (d,  $J_{PC} = 1.9$  Hz,  $CH$ ), 131.6, 132.1, 134.5 (d,  $J_{PC} = 12.1$  Hz,  $CH$ ), 139.8, 161.3 (d,  $J_{PC} = 9.2$  Hz,  $NCN$ ), 162.7 ( $J_{CF} = 248.9$  Hz,  $CF$ ), 173.7 (d,  $J_{PC} = 3.8$  Hz,  $CO$ ).  $^{31}P\{^1H\}$  NMR ( $CDCl_3$ ):  $\delta$  23.4. IR (KBr/pellet,  $cm^{-1}$ ): 3315 (br, w), 3197 (w), 3153 (w), 3087 (w), 3016 (w), 1675 (m), 1629 (s), 1560 (s), 1519 (m), 1459 (s), 1421 (m), 1303 (w), 1272 (m), 1234 (w), 1207 (m), 1168 (m), 1118 (m), 1083 (m), 971 (w), 910 (w), 871 (w),

808 (w), 769 (m), 719 (s), 688 (m), 570 (w), 539 (m), 518 (m), 476 (m), 439 (w). APCI-MS:  $m/z$  725.5  $[M + H]^+$ , 690.1  $[M - Cl]^+$ .

**Synthesis of 3.** To a 20 mL Schlenk flask, PdCl<sub>2</sub> (0.0990 g, 0.556 mmol), L<sup>1</sup> (0.200 g, 0.556 mmol), and K<sub>2</sub>CO<sub>3</sub> (0.308 g, 2.22 mmol) were dissolved in dry pyridine (10 mL) under nitrogen atmosphere. The solution was allowed to stir at ambient temperature for 5 h. The workup procedure was similar to that of **1** (method A). A yellowish solid was obtained. Yield: 0.154 g (51%). M.p.: 176.7–178.9°C. Anal. Calc. for C<sub>24</sub>H<sub>22</sub>ClFN<sub>4</sub>OPd: C, 53.05; H, 4.08; N, 10.31 %. Found: C, 53.20; H, 4.12; N, 10.23 %. <sup>1</sup>H NMR (CDCl<sub>3</sub>): δ 2.80 (s, 3H, CH<sub>3</sub>), 4.56 (s, 1H, PdCH), 5.10 (s, 2H, ArCH<sub>2</sub>), 6.85–7.21 (m, 12H, Ar-H, imi-H, py-H), 7.65 (t, 1H, <sup>3</sup>J<sub>HH</sub> = 7.5 Hz, py-H), 7.74 (s, 1H, imi-H), 8.52 (d, <sup>3</sup>J<sub>HH</sub> = 4.8 Hz, 2H, py-*o*-H). <sup>13</sup>C{<sup>1</sup>H} NMR (DMSO-*d*<sub>6</sub>): δ 10.6 (CH<sub>3</sub>), 50.0 (CH<sub>2</sub>), 79.5 (CHCO), 116.1 (d, *J*<sub>CF</sub> = 21.7 Hz, CH), 121.2, 121.5, 122.7, 123.2, 124.3 (py-C), 127.9, 130.0 (d, *J*<sub>CF</sub> = 8.3 Hz, CH), 131.3, 136.5 (py-C), 145.3, 146.6 (NCN), 150.0 (py-C), 162.3 (*J*<sub>CF</sub> = 244.6 Hz, CF), 170.7 (CO). IR (KBr/pellet, cm<sup>-1</sup>): 3288 (br, w), 3197 (w), 1654 (s), 1594 (w), 1569 (w), 1544 (m), 1471 (s), 1438 (s), 1344 (w), 1276 (m), 1209 (m), 1130 (w), 1054 (m), 937 (w), 879 (w), 806 (m), 719 (m), 680 (m), 644 (m), 563 (w), 501 (w), 455 (s), 431 (s). ESI-MS:  $m/z$  585.9  $[M - Cl + py]^+$ , 543.0  $[M + H]^+$ , 507.1  $[M - Cl]^+$ , 466.1  $[M - py + H]^+$ , 428.1  $[M - Cl - py]^+$ .

**Synthesis of 4.** A mixture of **3** (0.0516 g, 0.0940 mmol) and PPh<sub>3</sub> (0.0249 g, 0.0940 mmol) in dichloromethane (10 mL) was stirred at ambient temperature overnight. The solvent was removed completely under vacuum. The residue was washed thoroughly with diethyl ether to afford a yellowish solid. Yield: 0.0650 g (94 %). Mp: 178.6–180.5°C. Anal. Calc. for C<sub>37</sub>H<sub>32</sub>ClFN<sub>3</sub>OPPd: C,

61.16; H, 4.43; N, 5.78. Found: C, 61.19; H, 4.86; N, 5.31 %.  $^1\text{H}$  NMR (DMSO- $d_6$ ):  $\delta$  2.32 (s, 3H,  $\text{CH}_3$ ), 4.09 (s, 1H, PdCH), 5.09 (s, 2H, PhCH $_2$ ), 6.08 (t, 1H,  $^3J_{\text{HH}} = 6.9$  Hz, Ph-H), 7.05–7.99 (m, 25H, Ar-H, imi-H).  $^{13}\text{C}\{^1\text{H}\}$  NMR (DMSO- $d_6$ ):  $\delta$  10.0 ( $\text{CH}_3$ ), 31.1 ( $\text{CHCO}$ ), 49.7 ( $\text{CH}_2$ ), 116.2 (d,  $J_{\text{CF}} = 21.7$  Hz, CH), 120.0, 121.2, 123.6, 127.8, 128.5 (d,  $J_{\text{PC}} = 10.1$  Hz, Ph-C), 129.2 (d,  $J_{\text{CF}} = 11.8$  Hz, CH), 130.7, 131.1 (d,  $J_{\text{PC}} = 8.5$  Hz, Ph-C), 131.7, 131.9 (d,  $J_{\text{PC}} = 9.7$  Hz, Ph-C), 132.3, 134.4 (d,  $J_{\text{PC}} = 11.8$  Hz, Ph-C), 147.4 ((NCN), 162.5 ( $J_{\text{CF}} = 245.3$  Hz, CF), 172.6 (CO).  $^{31}\text{P}\{^1\text{H}\}$  NMR ( $\text{CDCl}_3$ ):  $\delta$  28.4. IR (KBr/pellet,  $\text{cm}^{-1}$ ): 3326 (br, w), 2996 (w), 1720 (m), 1654 (s), 1639 (s), 1596 (w), 1542 (s), 1500 (m), 1459 (s), 1425 (m), 1400 (m), 1342 (m), 1245 (m), 1213 (m), 1185 (m), 1081 (m), 919 (w), 800 (m), 728 (s), 676 (m), 553 (m), 522 (m), 482 (m), 447 (m), 424 (m). APCI-MS:  $m/z$  726.1  $[\text{M} + \text{H}^+]$ , 690.1  $[\text{M} - \text{Cl}]^+$ .

**Synthesis of 5.** Method A: The compound was prepared with a procedure similar to that of **1** (method A). A mixture of PdCl $_2$  (0.0781 g, 0.441 mmol), L $^2$  (0.200 g, 0.441 mmol), and K $_2$ CO $_3$  (0.243 g, 1.76 mmol) was used. A yellowish solid was obtained. Yield: 0.220 g (80 %). Method B: The compound was prepared with a procedure similar to that of **1** (method B). A pyridine solution of **6** (0.0500 g, 0.0780 mmol) was used. Yield: 0.0470 g (94%). M.p.: 198.3–199.1°C. Anal. Calc. for C $_{33}$ H $_{27}$ ClN $_4$ OPd: C, 62.17; H, 4.26; N, 8.78. Found: C, 62.20; H, 4.42; N, 8.63 %.  $^1\text{H}$  NMR ( $\text{CDCl}_3$ ):  $\delta$  5.89, 5.98 (ABq,  $^2J_{\text{AB}} = 15.9$  Hz,  $\Delta\nu_{\text{AB}} = 13.7$  Hz, 2H, NCH $_2$ ), 6.10 (s, 1H, CHC=O), 6.78–7.96 (m, 22H, Ar-H, imi-H, py-H), 8.88 (d,  $^3J_{\text{HH}} = 4.5$  Hz, 2H, *o*-py-H), 9.14 (s, 1H, NH).  $^{13}\text{C}\{^1\text{H}\}$  NMR (DMSO- $d_6$ ):  $\delta$  49.9 (NCH), 51.1 ( $\text{CH}_2$ ), 118.1, 122.4, 122.6, 123.2, 124.9 (py-C), 125.8, 126.7, 127.3, 127.7, 128.9, 129.1, 129.3, 129.5, 130.1, 131.1, 132.5, 133.4, 133.7, 138.0 (py-C), 139.7,

149.8 (NCN), 152.3 (py-C), 153.3, 172.4 (C=O). IR (KBr/pellet,  $\text{cm}^{-1}$ ): 3372 (br, w), 3207 (w), 3087 (w), 2979 (w), 1687 (m), 1637 (s), 1560 (s), 1508 (m), 1457 (s), 1425 (m), 1334 (w), 1276 (m), 1228 (m), 1197 (m), 1133 (br, m), 1049 (w), 991 (w), 927 (w), 827 (m), 777 (m), 736 (m), 709 (m), 680 (s), 599 (w), 547 (w), 520 (w), 491 (w), 449 (w), 426 (w). ESI-MS:  $m/z$  600.9  $[\text{M} - \text{Cl}]^+$ , 562.7  $[\text{M} - \text{Cl} - \text{py} + \text{CH}_3\text{CN}]^+$ , 522.1  $[\text{M} - \text{Cl} - \text{py}]^+$ .

**Synthesis of 6.** A mixture of  $\text{PdCl}_2$  (0.0780 g, 0.441 mmol),  $\text{L}^2$  (0.200 g, 0.441 mmol), and  $\text{K}_2\text{CO}_3$  (0.240 g, 1.76 mmol) in pyridine (10 mL) was stirred at room temperature overnight. The workup procedure was similar to that of **1** (method A). A yellowish solid was obtained. Yield: 0.18 g (65 %). M.p.: = 185.8–187.1°C. Anal. Calc. for  $\text{C}_{33}\text{H}_{27}\text{ClN}_4\text{OPd}$ : C, 62.17; H, 4.26; N, 8.78. Found: C, 61.60; H, 4.35; N, 8.36 %.  $^1\text{H}$  NMR ( $\text{CDCl}_3$ ):  $\delta$  4.56 (s, 1H, PdCH), 5.46 (s, 2H,  $\text{CH}_2$ ), 6.25–7.89 (m, 22H, 8.50 (d,  $^3J_{\text{HH}} = 4.8$  Hz, 2H, *o*-py-H).  $^{13}\text{C}\{^1\text{H}\}$  NMR ( $\text{DMSO}-d_6$ ):  $\delta$  49.9 ( $\text{CH}_2$ ), 121.7, 122.0, 123.0, 123.2, 124.3 (py-C), 124.7, 125.8, 126.8, 127.3, 127.9, 129.1, 129.3, 129.7, 129.9, 130.6, 130.9, 132.6, 133.4, 136.5 (py-C), 146.4 (NCN), 150.0 (py-C), 153.4, 171.0 (C=O). IR (KBr/pellet,  $\text{cm}^{-1}$ ): 3293 (br, w), 3174 (w), 3143 (w), 3008 (w), 1685 (w), 1654 (w), 1608 (m), 1562 (w), 1544 (m), 1508 (s), 1473 (s), 1413 (s), 1349 (w), 1274 (w), 1226 (w), 1197 (m), 1130 (m), 1049 (m), 987 (w), 827 (m), 777 (m), 736 (m), 682 (s), 559 (w), 520 (w), 484 (w), 458 (w), 431 (w). ESI-MS:  $m/z$  675.9  $[\text{M} - \text{Cl} + \text{DMF}]^+$ , 638.8  $[\text{M} + \text{H}]^+$ , 601.1  $[\text{M} - \text{Cl}]^+$ , 594.9  $[\text{M} - \text{Cl} - \text{py} + \text{DMF}]^+$ , 562.9  $[\text{M} - \text{Cl} - \text{py} + \text{CH}_3\text{CN}]^+$ , 560.9  $[\text{M} - \text{py}]^+$ , 522.1  $[\text{M} - \text{Cl} - \text{py}]^+$ .

**Synthesis of 7.** The compound was prepared with a procedure similar to that of **4**. A mixture of **6** (0.0238 g, 0.0909 mmol),  $\text{PPh}_3$  (0.0580 g, 0.0909 mmol) was used. A yellowish product was

obtained. Yield: 0.0680 g (92 %). M.p.: 178.1–181.2°C. Anal. Calc. for C<sub>46</sub>H<sub>37</sub>ClN<sub>3</sub>OPd: C, 67.32; H, 4.54; N, 5.12. Found: C, 67.04; H, 4.70; N, 4.83 %. <sup>1</sup>H NMR (DMSO-*d*<sub>6</sub>): δ 4.00 (s, 1H, PdCH), 5.59 (s, 2H, CH<sub>2</sub>), 6.79–7.97 (m, 34H, Ar-*H*, imi-*H*). <sup>13</sup>C{<sup>1</sup>H} NMR (CDCl<sub>3</sub>): δ 10.6 (CH<sub>3</sub>), 50.0 (CH<sub>2</sub>), 79.5 (CHC=O), 116.1 (d, *J*<sub>CF</sub> = 21.7 Hz, CH), 121.2, 121.5, 122.7, 123.2, 124.3 (py-*C*), 127.9, 130.0 (d, *J*<sub>CF</sub> = 8.3 Hz, CH), 131.3, 136.5 (py-*C*), 145.3, 146.6 (NCN), 150.0 (py-*C*), 162.3 (*J*<sub>CF</sub> = 244.6 Hz, CF), 170.7 (C=O). <sup>31</sup>P{<sup>1</sup>H} NMR (DMSO-*d*<sub>6</sub>): δ 28.3. IR (KBr/pellet, cm<sup>-1</sup>): 3461 (br, w), 3056 (w), 2933 (w), 1695 (w), 1681 (w), 1621 (s), 1589 (m), 1486 (m), 1434 (m), 1363 (m), 1263 (w), 1184 (m), 1097 (m), 1027 (w), 998 (w), 879 (w), 786 (m), 750 (m), 696 (s), 534 (s), 511 (m), 451 (w), 433 (w). ESI-MS: *m/z* 860.1 [M + K]<sup>+</sup>, 856.8 [M – Cl + DMF]<sup>+</sup>, 824.5 [M – Cl + CH<sub>3</sub>CN]<sup>+</sup>, 820.2 [M + H]<sup>+</sup>, 784.3 [M – Cl]<sup>+</sup>.

**Synthesis of 8.** To a 20 mL Schlenk flask, PdCl<sub>2</sub> (0.0948 g, 0.534 mmol), L<sup>3</sup> (0.200 g, 0.534 mmol), and K<sub>2</sub>CO<sub>3</sub> (0.295 g, 2.14 mmol) were added and dissolved in dry pyridine (10 mL) under nitrogen atmosphere. The solution was allowed to stir at 80°C overnight. The solvent was then completely removed under vacuum. The residue was re-dissolved in dichloromethane and washed with water. The extract was dried over anhydrous MgSO<sub>4</sub> and evaporated to dryness under vacuum to give a solid. Diethyl ether was added and the yellowish solid formed was collected on frit, washed with more diethyl ether and methanol, and dried under vacuum. Yield: 0.143 g (48 %). M.p.: 164.8–165.6°C. Anal. Calc. For C<sub>25</sub>H<sub>24</sub>ClFN<sub>4</sub>OPd: C, 53.87; H, 4.34; N, 10.05. Found: C, 53.10; H, 4.44; N, 10.13 %. <sup>1</sup>H NMR (CDCl<sub>3</sub>): δ 2.82 (s, 3H, imi-CH<sub>3</sub>), 3.38 (s, 3H, N-CH<sub>3</sub>), 4.98, 5.18 (ABq, <sup>3</sup>*J*<sub>AB</sub> = 15.6 Hz, Δ*v*<sub>AB</sub> = 29.7 Hz, 2H, CH<sub>2</sub>), 5.61 (s, 1H, PdCH), 6.57–7.29 (m, 12H, Ar-*H*, imi-*H*,



Py-H), 7.66 (t,  $^3J_{\text{HH}} = 8.1$  Hz, 1H, Py-*p*-H), 8.80 (d,  $^3J_{\text{HH}} = 4.8$  Hz, 2H, Py-*o*-H).  $^{13}\text{C}\{^1\text{H}\}$  NMR (DMSO-*d*<sub>6</sub>):  $\delta$  14.0 (CH<sub>3</sub>), 33.3 (CH<sub>3</sub>), 48.7 (CHC=O), 49.7 (CH<sub>2</sub>), 116.0 (d,  $J_{\text{CF}} = 21.6$  Hz, CH), 116.4, 123.4, 124.2, 124.6, 124.3, 129.9 (d,  $J_{\text{CF}} = 8.2$  Hz, CH), 131.8, 137.6, 144.3 (NCN), 162.2 ( $J_{\text{CF}} = 244.5$  Hz, CF), 169.7 (C=O). IR (KBr/pellet, cm<sup>-1</sup>): 3394 (w), 3345 (w), 3318 (w), 3232 (w), 3176 (w), 3100 (w), 3018 (w), 1656 (m), 1617 (m), 1585 (s), 1544 (s), 1484 (s), 1438 (w), 1402 (m), 1319 (m), 1278 (m), 1243 (m), 1203 (s), 1139 (m), 1083 (m), 958 (m), 908 (br, m), 802 (m), 734 (m), 711 (m), 630 (w), 578 (w), 514 (w), 476 (m), 420 (w). ESI-MS:  $m/z$  521.0 [M – Cl – py + 2CH<sub>3</sub>CN]<sup>+</sup>, 514.9 [M – Cl – py + DMF]<sup>+</sup>, 482.9 [M – Cl – py + CH<sub>3</sub>CN]<sup>+</sup>.

**Synthesis of 9.** In a 20 mL Schlenk flask, a THF (5 mL) solution of **8** (0.0826 g, 0.148 mmol) was heated at 50 °C for 3 h. The solid was collected on a frit, washed with THF, and dried under vacuum. Yield: 0.0636 g (90%). M.p.: 202.1–203.0 °C. Anal. Calc. for C<sub>40</sub>H<sub>38</sub>Cl<sub>2</sub>F<sub>2</sub>N<sub>6</sub>O<sub>2</sub>Pd<sub>2</sub>: C, 50.22; H, 4.00; N, 8.78. Found: C, 49.97; H, 3.80; N, 8.85 %.  $^1\text{H}$  NMR (DMSO-*d*<sub>6</sub>):  $\delta$  2.58 (s, 6H, CCH<sub>3</sub>), 3.20 (s, 6H, NCH<sub>3</sub>), 5.34 (s, 4H, NCH<sub>2</sub>), 5.52 (s, 2H, PdCH), 6.81–7.69 (m, 20H, Ar-*H*, imi-*H*).  $^{13}\text{C}\{^1\text{H}\}$  NMR (DMSO-*d*<sub>6</sub>):  $\delta$  14.0 (CH<sub>3</sub>), 33.3 (NCH<sub>3</sub>), 48.7 (CHCO), 49.7 (CH<sub>2</sub>), 116.0 (d,  $J_{\text{CF}} = 21.6$  Hz, CH), 116.4, 123.4, 124.2, 124.6, 124.3, 129.9 (d,  $J_{\text{CF}} = 8.2$  Hz, CH), 131.8, 137.6, 144.3 (NCN), 162.2 ( $J_{\text{CF}} = 244.5$  Hz, CF), 169.7 (CO). IR (KBr/pellet, cm<sup>-1</sup>): 3324 (br, w), 3180 (w), 3043 (w), 2886 (w), 1718 (m), 1685 (m), 1654 (s), 1639 (s), 1594 (s), 1560 (m), 1542 (s), 1527 (s), 1498 (s), 1475 (s), 1438 (m), 1398 (m), 1276 (w), 1245 (m), 1214 (m), 1166 (w), 1139 (m), 1083 (m), 966 (w), 889 (w), 794 (m), 765 (w), 725 (m), 632 (w), 599 (m), 499 (m), 482 (s), 464 (m), 430 (m). ESI-MS:  $m/z$  920.8 [M – Cl]<sup>+</sup>, 514.9 [M/2 – Cl + DMF]<sup>+</sup>, 482.9 [M/2 – Cl + CH<sub>3</sub>CN]<sup>+</sup>.

**X-ray diffraction studies.** Crystal structures were collected at 150(2) K on a Bruker APEX II equipped with a CCD area detector and a graphite monochromator utilizing Mo K $\alpha$  radiation ( $\lambda = 0.71073 \text{ \AA}$ ). The unit cell parameters were obtained by least-squares refinement. Data collection and reduction were performed using the Bruker APEX2 and SAINT software.<sup>2</sup> Absorption corrections were performed using the SADABS program.<sup>3</sup> All the structures were solved by direct methods and refined by full-matrix least squares methods against  $F^2$  with the SHELXTL software package.<sup>4</sup> All non-H atoms were refined anisotropically. All H-atoms were fixed at calculated positions and refined with the use of a riding model. In the structure of  $7 \cdot \text{C}_3\text{H}_7\text{NO}$ , the DMF solvent is disordered with two orientations of 50:50 occupancy ratio. The disordered molecule was successfully refined as a rigid group. The SIMU instruction is used for C47 to O2 and C47a to O2A. Crystallographic data are listed in Table 1. CCDC-850737 (**1**), -850738 (**2**), -850739 ( $4 \cdot 0.5\text{C}_4\text{H}_{10}\text{O} \cdot \text{C}_3\text{H}_7\text{NO}$ ), -850740 ( $5 \cdot \text{CH}_2\text{Cl}_2$ ), -850741 ( $7 \cdot \text{C}_3\text{H}_7\text{NO}$ ), and -850742 ( $9 \cdot 4\text{C}_3\text{H}_7\text{NO}$ ) contain the supplementary crystallographic data for this paper. These data can be obtained free of charge from The Cambridge Crystallographic Data Centre via [www.ccdc.cam.ac.uk/data\\_request/cif](http://www.ccdc.cam.ac.uk/data_request/cif).

**Computational details.** All computational results were calculated with Gaussian 09 program.<sup>5</sup>

Density functional theory (DFT) with B3LYP/LANL2DZ level of theory was applied for all calculations. For solvent correction, a Polarized Continuum (overlapping spheres) model (PCM) with pyridine as solvent was used. The computational results for three most stable structural isomers **S1**, **S2**, **S3** and proposed transition state **TS1** are listed in the Table 5S. As shown in the Table 5S, the solvent effect is very small (barrier reduced from 38.1 to 35.3 kcal/mole). However, this barrier reduced significantly (from 38.1 to 25.9 kcal/mole) when additional pyridine molecule is added into the system. Although the complex **TS1+Pyridine** (Figure S3) might be an intermediate instead of transition state (since the imaginary frequency is only  $-18\text{ cm}^{-1}$ ), the results suggest that pyridine might play a catalytic role in the reaction.

**Table S1.** Crystallographic data.

|                                                                 | <b>1</b>                                                            | <b>2</b>                                               | <b>4 · 0.5C<sub>4</sub>H<sub>10</sub>O · C<sub>3</sub>H<sub>7</sub>NO</b>                                                       | <b>5 · CH<sub>2</sub>Cl<sub>2</sub></b>                                                | <b>7 · C<sub>3</sub>H<sub>7</sub>NO</b>                                                  | <b>9 · 4C<sub>3</sub>H<sub>7</sub>NO</b>                                                                                                         |
|-----------------------------------------------------------------|---------------------------------------------------------------------|--------------------------------------------------------|---------------------------------------------------------------------------------------------------------------------------------|----------------------------------------------------------------------------------------|------------------------------------------------------------------------------------------|--------------------------------------------------------------------------------------------------------------------------------------------------|
| empirical formula                                               | C <sub>25</sub> H <sub>24</sub> Cl <sub>3</sub> FN <sub>4</sub> OPd | C <sub>37</sub> H <sub>32</sub> ClFN <sub>3</sub> OPPd | C <sub>37</sub> H <sub>32</sub> ClFN <sub>3</sub> OPPd · 0.5C <sub>4</sub> H <sub>10</sub> O · C <sub>3</sub> H <sub>7</sub> NO | C <sub>33</sub> H <sub>27</sub> ClN <sub>4</sub> OPd · CH <sub>2</sub> Cl <sub>2</sub> | C <sub>46</sub> H <sub>37</sub> ClN <sub>3</sub> OPPd · C <sub>3</sub> H <sub>7</sub> NO | C <sub>40</sub> H <sub>38</sub> Cl <sub>2</sub> F <sub>2</sub> N <sub>6</sub> O <sub>2</sub> Pd <sub>2</sub> · 4C <sub>3</sub> H <sub>7</sub> NO |
| formula weight                                                  | 628.23                                                              | 726.48                                                 | 836.13                                                                                                                          | 722.36                                                                                 | 893.70                                                                                   | 1248.85                                                                                                                                          |
| crystal system                                                  | triclinic                                                           | triclinic                                              | triclinic                                                                                                                       | triclinic                                                                              | triclinic                                                                                | triclinic                                                                                                                                        |
| space group                                                     | <i>P</i> $\bar{1}$                                                  | <i>P</i> $\bar{1}$                                     | <i>P</i> $\bar{1}$                                                                                                              | <i>P</i> $\bar{1}$                                                                     | <i>P</i> $\bar{1}$                                                                       | <i>P</i> $\bar{1}$                                                                                                                               |
| <i>a</i> , Å                                                    | 9.5854(5)                                                           | 9.3340(4)                                              | 14.5982(11)                                                                                                                     | 9.8587(2)                                                                              | 12.507(6)                                                                                | 9.4686(11)                                                                                                                                       |
| <i>b</i> , Å                                                    | 10.3690(6)                                                          | 10.4256(4)                                             | 16.6492(13)                                                                                                                     | 11.1511(3)                                                                             | 13.088(12)                                                                               | 11.5276(14)                                                                                                                                      |
| <i>c</i> , Å                                                    | 14.3676(7)                                                          | 18.9156(8)                                             | 17.5208(15)                                                                                                                     | 15.0170(4)                                                                             | 14.438(7)                                                                                | 13.1627(16)                                                                                                                                      |
| <i>α</i> , deg                                                  | 83.969(2)                                                           | 80.502(3)                                              | 81.635(6)                                                                                                                       | 80.665(2)                                                                              | 103.747(9)                                                                               | 90.963(7)                                                                                                                                        |
| <i>β</i> , deg                                                  | 71.762(2)                                                           | 77.272(2)                                              | 70.792(5)                                                                                                                       | 89.264(2)                                                                              | 115.434(6)                                                                               | 106.242(6)                                                                                                                                       |
| <i>γ</i> , deg                                                  | 72.577(2)                                                           | 68.741(2)                                              | 82.732(4)                                                                                                                       | 73.218(2)                                                                              | 90.425(9)                                                                                | 94.606(7)                                                                                                                                        |
| <i>V</i> , Å <sup>3</sup>                                       | 1293.95(12)                                                         | 1665.96(12)                                            | 3964.4(5)                                                                                                                       | 1558.65(7)                                                                             | 2057(2)                                                                                  | 1373.8(3)                                                                                                                                        |
| <i>T</i> , K                                                    | 150(2)                                                              | 150(2)                                                 | 150(2)                                                                                                                          | 150(2)                                                                                 | 150(2)                                                                                   | 150(2)                                                                                                                                           |
| <i>Z</i>                                                        | 2                                                                   | 2                                                      | 4                                                                                                                               | 2                                                                                      | 2                                                                                        | 1                                                                                                                                                |
| no. of unique data                                              | 6602                                                                | 8601                                                   | 17316                                                                                                                           | 8024                                                                                   | 10604                                                                                    | 5937                                                                                                                                             |
| no. of params refined                                           | 316                                                                 | 407                                                    | 954                                                                                                                             | 388                                                                                    | 550                                                                                      | 340                                                                                                                                              |
| <i>R</i> <sub>1</sub> <sup>a</sup> [ <i>I</i> > 2σ( <i>I</i> )] | 0.0466                                                              | 0.0529                                                 | 0.0588                                                                                                                          | 0.0631                                                                                 | 0.0663                                                                                   | 0.0514                                                                                                                                           |
| <i>wR</i> <sub>2</sub> <sup>b</sup> (all data)                  | 0.1048                                                              | 0.1013                                                 | 0.1387                                                                                                                          | 0.1592                                                                                 | 0.1846                                                                                   | 0.1371                                                                                                                                           |

<sup>a</sup>  $R_1 = \sum(|F_o| - |F_c|) / \sum |F_o|$ . <sup>b</sup>  $wR_2 = [\sum(|F_o|^2 - |F_c|^2)^2 / \sum (F_o^2)]^{1/2}$

**Table S2.** Selected bond distances (Å) and angles (°) of **1** and **2**.

| <b>1</b>   |            | <b>2</b>   |            |
|------------|------------|------------|------------|
| Pd1—C7     | 2.034(4)   | Pd1—C1     | 2.036(4)   |
| Pd1—C8     | 2.059(4)   | Pd1—P1     | 2.0373(11) |
| Pd1—N1     | 2.101(3)   | Pd1—Cl1    | 2.3810(12) |
| Pd1—Cl1    | 2.4093(3)  | Pd1—C5     | 2.122(4)   |
| C7—Pd1—C8  | 86.02(14)  | C1—Pd1—C5  | 83.99(18)  |
| C8—Pd1—Cl1 | 96.07(10)  | C5—Pd1—Cl1 | 90.27(13)  |
| Cl1—Pd1—N1 | 89.76(8)   | P1—Pd1—Cl1 | 95.02(4)   |
| C7—Pd1—N1  | 88.16(13)  | C1—Pd1—P1  | 90.66(13)  |
| C8—Pd1—N1  | 173.63(13) | C5—Pd1—P1  | 171.01(13) |
| C7—Pd1—Cl1 | 177.88(11) | C1—Pd1—Cl1 | 174.26(14) |

**Table S3.** Selected bond distances (Å) and angles (°) of **4·0.5C<sub>4</sub>H<sub>10</sub>O·C<sub>3</sub>H<sub>7</sub>NO**.<sup>a</sup>

|            |            |             |            |
|------------|------------|-------------|------------|
| Pd1—C2     | 2.018(5)   | Pd2—C39     | 2.036(5)   |
| Pd1—N3     | 2.088(4)   | Pd2—N6      | 2.078(4)   |
| Pd1—Cl1    | 2.3960(15) | Pd2—Cl2     | 2.4010(14) |
| Pd1—P1     | 2.2317(16) | Pd2—P2      | 2.2408(16) |
| C2—Pd1—P1  | 98.30(17)  | C39—Pd2—P2  | 100.14(16) |
| C2—Pd1—N3  | 67.0(2)    | C39—Pd2—N6  | 66.63(19)  |
| N3—Pd1—Cl1 | 103.02(13) | N6—Pd2—Cl2  | 102.24(12) |
| Cl1—Pd1—P1 | 91.48(6)   | Cl2—Pd2—P2  | 91.07(5)   |
| C2—Pd1—Cl1 | 169.70(16) | C39—Pd2—Cl2 | 168.74(16) |
| N3—Pd1—P1  | 164.86(13) | N6—Pd2—P2   | 166.29(12) |

<sup>a</sup> There are two independent molecules.

**Table S4.** Selected bond distances (Å) and angles (°) of **5**·CH<sub>2</sub>Cl<sub>2</sub> and **7**·C<sub>3</sub>H<sub>7</sub>NO.

| <b>5</b>    |            | <b>7</b>    |            |
|-------------|------------|-------------|------------|
| Pd1—C26     | 2.035(5)   | Pd1—C21     | 2.043(5)   |
| Pd1—C20     | 2.008(5)   | Pd1—N3      | 2.068(4)   |
| Pd1—Cl1     | 2.4217(14) | Pd1—P1      | 2.234(2)   |
| Pd1—N3      | 2.124(5)   | Pd1—Cl1     | 2.3585(15) |
|             |            |             |            |
| C20—Pd1—C26 | 87.6(2)    | C21—Pd1—N3  | 65.41(16)  |
| C20—Pd1—N3  | 94.1(2)    | C21—Pd1—P1  | 103.25(13) |
| C26—Pd1—Cl1 | 88.19(16)  | N3—Pd1—N1   | 166.22(12) |
| N3—Pd1—Cl1  | 89.86(13)  | C21—Pd1—Cl1 | 164.29(12) |
| C26—Pd1—N3  | 177.5(2)   | N3—Pd1—Cl1  | 99.87(11)  |
| C20—Pd1—Cl1 | 173.24(16) | P1—Pd1—Cl1  | 92.06(5)   |

**Table S5.** Computational results for **S1**, **S2**, **S3** and **TS1** (at B3LYP/LANL2DZ theory)

|                                                                  | <b>S1</b>     | <b>S2</b>     | <b>S3</b>     | <b>TS1</b>    |
|------------------------------------------------------------------|---------------|---------------|---------------|---------------|
| <b>Gas Phase</b>                                                 |               |               |               |               |
| Energy (a.u.)                                                    | -1463.4543713 | -1463.4630939 | -1463.4533703 | -1463.4023038 |
| Rel. Energy (kcal/mol)                                           | 5.5           | 0             | 6.1           | 38.1          |
| Rel. Free Energy (kcal/mol)                                      | 5.6           | 0             | 8.2           | 36.8          |
| Dipole Moment (Debye)                                            | 4.4           | 10.5          | 4.0           | 6.2           |
| Imaginary Frequencies (cm <sup>-1</sup> )                        | None          | None          | None          | -110          |
| <b>Solution (in Pyridine, PCM, Single-Point)</b>                 |               |               |               |               |
| Energy (a.u.)                                                    | -1463.4861961 | -1463.4950107 | -1463.4836895 | -1463.4386789 |
| Rel. Energy (kcal/mol)                                           | 5.5           | 0             | 7.1           | 35.3          |
| Dipole Moment (Debye)                                            | 5.3           | 13.2          | 5.6           | 7.8           |
| <b>S1+Pyridine    S2+Pyridine    S3+Pyridine    TS1+Pyridine</b> |               |               |               |               |
| <b>Gas Phase</b>                                                 |               |               |               |               |
| Energy (a.u.)                                                    | -1711.6989045 | -1711.7122670 | -1711.7028196 | -1711.6710328 |
| Rel. Energy (kcal/mol)                                           | 8.4           | 0             | 5.9           | 25.9          |
| Rel. Free Energy (kcal/mol)                                      | 8.3           | 0             | 8.4           | 30.3          |
| Dipole Moment (Debye)                                            | 2.8           | 10.3          | 4.5           | 11.4          |
| Imaginary Frequencies (cm <sup>-1</sup> )                        | None          | None          | None          | -18           |
| <b>Solution (in Pyridine, PCM, Single-Point)</b>                 |               |               |               |               |
| Energy (a.u.)                                                    | -1711.7347341 | -1711.7446522 | -1711.7331231 | -1711.7106291 |
| Rel. Energy (kcal/mol)                                           | 6.2           | 0             | 7.2           | 21.3          |
| Dipole Moment (Debye)                                            | 3.5           | 12.9          | 5.9           | 14.1          |

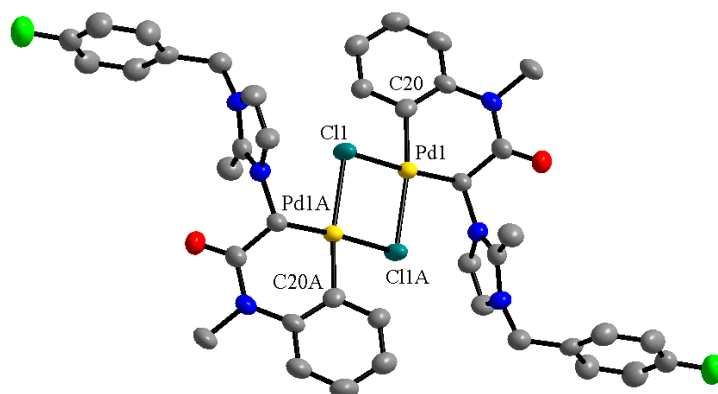

**Figure S1.** Molecular structures of  $9 \cdot 4C_3H_7NO$  with 50% probability ellipsoids for non-H atoms. Hydrogen atoms and solvent molecules were omitted for clarity. The dimeric compound lies about an inversion centre. Selected bond distances ( $\text{\AA}$ ) and angles (deg): Pd1—C12 2.034(4), Pd1—C20 1.989(4), Pd1—Cl1 2.4295(11), Pd1—Cl1A 2.4774(11); C12—Pd1—C20 82.79(17), Cl1—Pd1—Cl1A 83.24(4), C12—Pd1—Cl1A 99.49(12), C20—Pd1—Cl1 95.11(12), Cl1A—Pd1—C20 168.93(12), C12—Pd1—Cl1 175.89(11). Symmetry code for A:  $1 - x, -y, 1 - z$ .

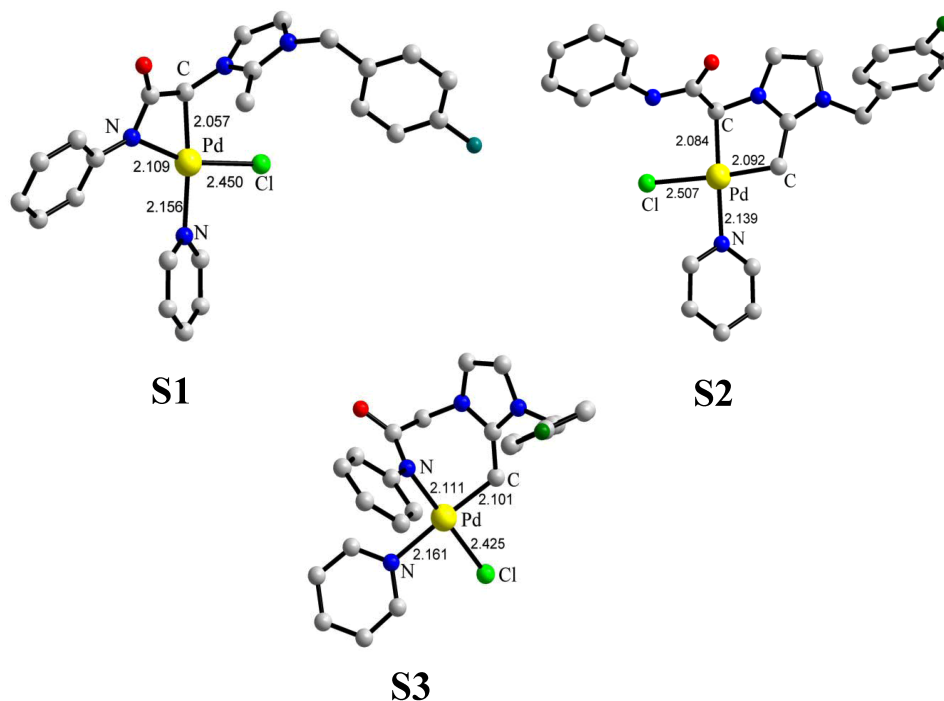

**Figure S2.** DFT optimized structures for S1—S3. H atoms are omitted for clarity. Selected distances ( $\text{\AA}$ ) are indicated.



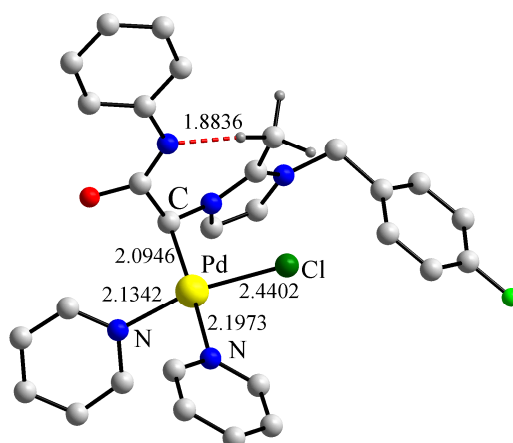

**Figure S3.** DFT optimized structure for **TS1 + Pyridine**. H atoms except those on methyl group are omitted for clarity. Selected distances (Å) are indicated.

### References

1. C.-Y. Liao, K.-T. Chan, P.-L. Chiu, C.-Y. Chen and H. M. Lee, *Organometallics*, 2007, **26**, 1692-1702.
2. *APEX2 and SAINT*. Bruker AXS Inc., Madison, Wisconsin, USA., 2007.
3. G. M. Sheldrick, *SADABS*. University of Göttingen, Germany, 1996.
4. G. Sheldrick, *Acta Crystallogr.*, 2008, **A64**, 112-122.
5. M. J. T. Frisch, G. W.; Schlegel, H. B.; Scuseria, G. E.; Robb, M. A.; Cheeseman, J. R.; Montgomery Jr., J. A.; Vreven, T.; Kudin, K. N.; Burant, J. C.; Millam, J. M.; Lyengar, S. S.; Tomasi, J.; Barone, V.; Mennucci, B.; Cossi, M.; Scalmani, G.; Rega, N.; Petersson, G. A.; Nakatsuji, H.; Hada, M.; Ehara, M.; Toyota, K.; Fukuda, R.; Hasegawa, J.; Ishida, M.; Nakajima, T.; Honda, Y.; Kitao, O.; Nakai, H.; Klene, M.; Li, X.; Knox, J. E.; Hratchian, H. P.; Cross, J. B.; Adamo, C.; Jaramillo, J.; Gomperts, R.; Stratmann, R. E.; Yazyev, O.; Austin, A. J.; Cammi, R.; Pomelli, C.; Ochterski, J.; Ayala, P. Y.; Morokuma, K.; Voth, G. A.; Salvador, P.; Dannenberg, J. J.; Zakrzewski, V. G.; Dapprich,

S.; Daniels, A. D.; Strain, M. C.; Farkas, O.; Malick, D. K.; Rabuck, A. D.;  
Raghavachari, K.; Foresman, J. B.; Ortiz, J. V.; Cui, Q.; Baboul, A. G.;  
Clifford, S.; Cioslowski, J.; Stefanov, B. B.; Liu, G.; Liashenko, A.; Piskorz, P.;  
Komaromi, I.; Martin, R. L.; Fox, D. J.; Keith, T.; Al-Laham, M. A.; Peng, C.  
Y.; Nanayakkara, A.; Challacombe, M.; Gill, P. M. W.; Johnson, B.; Chen, W.;  
Wong, M. W.; Gonzalez, C.; Pople, J. A., *Gaussian, Inc.*, Pittsburgh PA, 2009.
